# Supplementary material
Source: Springer Nature journal article supplement (https://www.springermedizin.de/resource/supplementary/12879_2012_2146_MOESM1_ESM.pdf/9443732)

NUMBER OF AOM EPISODES IN EACH AGE GROUP  
POSITIVE FOR A BACTERIAL PATHOGEN

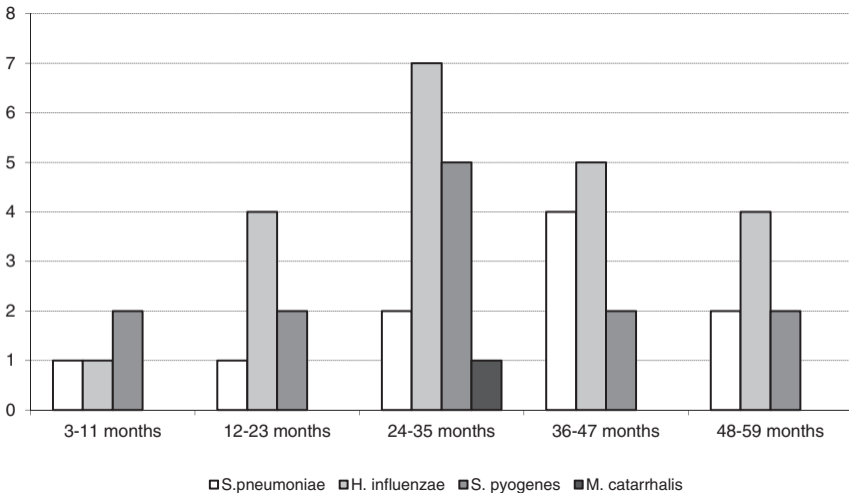

Supplement: MOESM1 [file 9443732]
